# Supplementary material for: A FRET-Based Assay for the Identification of PCNA Inhibitors
Source: MDPI journal article supplement (doi:10.3390/ijms241411858), 2023-07-24
Supplement: s1 [file s1 › ijms-2517157-supplementary.pdf]

**Supplementary Materials:**

**Table S1.** List of PCNA<sup>141-155</sup> amino acid sequences from different eukaryotic species using HomoloGene database [87]. Cysteine at position 148 was marked in red.

| Organism                                | Sequence                 |
|-----------------------------------------|--------------------------|
| <i>Homo sapiens</i>                     | SGEFARI <b>C</b> RDLSHIG |
| <i>Pan troglodytes</i>                  | SGEFARI <b>C</b> RDLSHIG |
| <i>Macaca mulatta</i>                   | SGEFARI <b>C</b> RDLSHIG |
| <i>Canis lupus familiaris</i>           | SGEFARI <b>C</b> RDLSHIG |
| <i>Bos taurus</i>                       | SGEFARI <b>C</b> RDLSHIG |
| <i>Mus musculus</i>                     | SGEFARI <b>C</b> RDLSHIG |
| <i>Rattus norvegicus</i>                | SGEFARI <b>C</b> RDLSHIG |
| <i>Gallus gallus</i>                    | SAEFARI <b>C</b> RDLSHIG |
| <i>Xenopus tropicalis</i>               | SGEFARI <b>C</b> RDLSHIG |
| <i>Danio rerio</i>                      | AMEFARI <b>C</b> RDLAQFS |
| <i>Drosophila melanogaster</i>          | AMEFARI <b>C</b> RDLSQFG |
| <i>Anopheles gambiae str. PEST</i>      | AGEFQKT <b>C</b> KDLSTFS |
| <i>Caenorhabditis elegans</i>           | SSEFSKIVRDLSQLS          |
| <i>Saccharomyces cerevisiae S288C</i>   | SADFAKTVRDLSQLS          |
| <i>Kluyveromyces lactis</i>             | SAEFAKIIRDNLNQLS         |
| <i>Eremothecium gossypii ATCC 10895</i> | AAEFQRITRDLLTLS          |
| <i>Schizosaccharomyces pombe</i>        | SAEFRRI <b>C</b> TDLLAMS |
| <i>Pyricularia oryzae 70-15</i>         | SSEFKRITTDLMAMS          |
| <i>Neurospora crassa OR74A</i>          | SGEFSRI <b>C</b> KDLSSIG |
| <i>Arabidopsis thaliana</i>             | SNEFSRI <b>C</b> KDLSSIG |
| <i>Oryza sativa Japonica Group</i>      | SGEFARI <b>C</b> RDLSQIG |

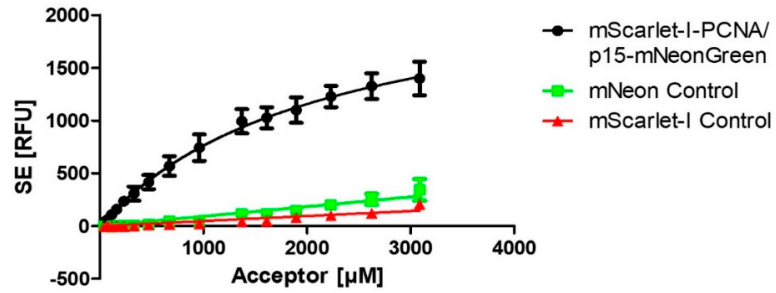

**Figure S1.** Proof of specific binding in the FRET assay. An amount of 1  $\mu$ M of p15-mNeonGreen was incubated with increasing mScarlet-I-PCNA<sup>WT</sup> concentrations (0-2.1  $\mu$ M) for 1 h at 37 °C at 300 rpm. As nonbinding controls, the interaction of mNeonGreen/mScarlet-I-PCNA or mNeonGreen-p15/mScarlet-I was analyzed. The sensitized emission (SE) of three experiments in triplicates was shown. For further analysis of binding, the sensitized emission of the mNeonGreen control was subtracted from the sensitized emission of the samples. RFU= Relative Fluorescence Units.

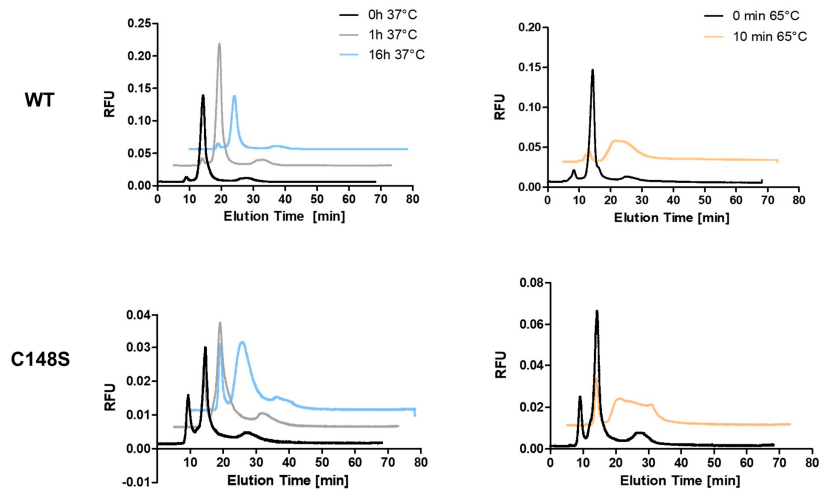

**Figure S2.** The C148S mutation decreases the thermal stability of mScarlet-I-PCNA. Proteins were incubated at 37 °C for 0 h (black), 1 h (grey) or 16 h (blue) or at 65 °C for 10 min (orange) and were afterwards injected to AF4. The induction of aggregates was evaluated by plotting the fluorescence emission at 610 nm against the elution time. The increase of thermal stress correlates with higher elution times, which can be explained by the formation of higher molecular weight complexes.

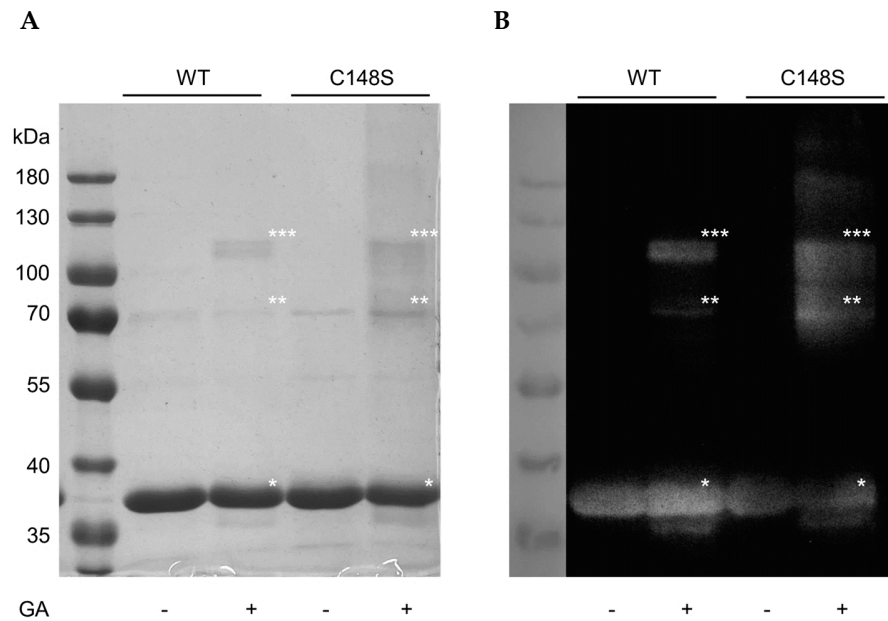

**Figure S3.** C148S does not prevent trimerization of PCNA. PCNA<sup>WT</sup> and PCNA<sup>C148S</sup> were crosslinked using 0.004% glutaraldehyde for 10 min at RT. 5 µg protein were loaded on a 10% SDS-PAGE gel and stained by Coomassie brilliant-blue (A) or transferred to an PVDF membrane and immunoblotted with an antibody against the His<sub>6</sub>-epitope (B). The asterisks mark the bands of the monomeric (\*, 31.2 kDa) dimeric (\*\*, 62.4 kDa) or trimeric (\*\*\*, 93.6 kDa) PCNA.

**Table S2.** List of oligonucleotides used in this work.

| Number           | Oligonucleotide sequence                                                         | Plasmid           | Usage                                                                                             |
|------------------|----------------------------------------------------------------------------------|-------------------|---------------------------------------------------------------------------------------------------|
| Pr2844<br>Pr2845 | AGATCCACTCCACCCTCTT-<br>TCTCATCGTTGGTG; GAGC-<br>TTACAAGTAAGGATCCGG-<br>CTGCTAAC | pSR052-<br>vector | In-Fusion:<br>generation of p15-<br>mNeon<br>intracellular<br>expression<br>plasmid               |
| Pr1878<br>PR1879 | GGTGAGGTGATCTATGGT-<br>GACAAGGGCGAG; TTA-<br>CTTACAGCTCGTCCAT-GC                 | pSR052-<br>insert | In-Fusion:<br>generation of p15-<br>mNeon<br>intracellular<br>expression<br>plasmid               |
| Pr427<br>Pr2837  | CATATGATGGTGATGGTG-<br>GTCATGGTATATCTCCTTC;<br>GGTGGAGGTGGATCTATG-<br>TTCGAGGCG  | PSR046-<br>vector | In-Fusion:<br>generation of<br>mScarlet-I-PCNA<br>connected by the<br>flexible linker<br>(GGGGS). |

| Number           | Oligonucleotide sequence                                                                                                         | Plasmid           | Usage                                                                                                                           |
|------------------|----------------------------------------------------------------------------------------------------------------------------------|-------------------|---------------------------------------------------------------------------------------------------------------------------------|
| Pr1963<br>Pr2119 | CACCATCACCATCAATGG-<br>TGACAAGGGCGAGGC; AG-<br>ATCCATCCACCCTGTACA-<br>GCTCGTCCATGCC                                              | pSR046-<br>insert | In-Fusion:<br>generation of<br>mScarlet-I-PCNA<br>connected by the<br>flexible linker<br>(GGGGs).                               |
| Pr1518<br>Pr2840 | ATGTTTCGAGGCGCGCCTGG;<br>CTTACAGCTCGTCCATGC-<br>CGC                                                                              | pSR051-<br>vector | In-Fusion:<br>Incorporation of<br>the hydrophilic<br>flexible linker in<br>mScarlet-I-PCNA<br>sequence<br>(GEGQQQGPR<br>GYAYRS) |
| Pr2838<br>Pr2839 | GACGAGCTGTACAAGGGC-<br>GAAGGCCAGGGCCAGGG-<br>CCAGGGCCCGGGCCGCGG-<br>CTATGCGTATCGCAGCAT-<br>GTTTCGAGGCGCGC; GCGC-<br>GCCTCGAACATG | pSR051-<br>Insert | In-Fusion:<br>Incorporation of<br>the hydrophilic<br>flexible linker in<br>mScarlet-I-PCNA<br>sequence<br>(GEGQQQGPR<br>GYAYRS) |
| Pr3199<br>Pr3200 | TGAGATCTCGGGATATACGT<br>GCAAATTCACC; TTTGC-<br>ACGTATATCCCGAGATCT-<br>CAGCC                                                      | pSR080;<br>pSR081 | Mutagenesis:<br>Incorporation of<br>C148S in PCNA or<br>mScarlet-I-PCNA<br>sequence                                             |

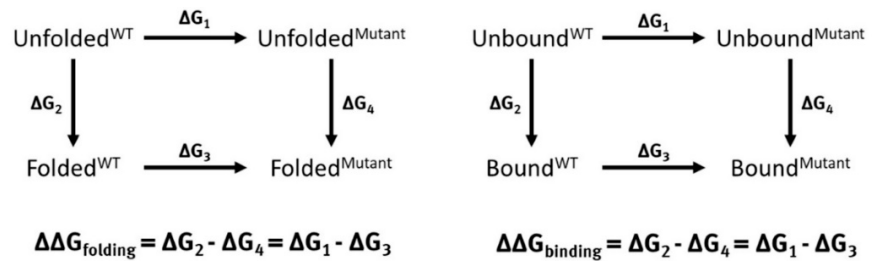

**Figure S4.** Thermodynamic cycle used for the calculation of  $\Delta\Delta G_{\text{folding}}$  (left) and  $\Delta\Delta G_{\text{binding}}$  (right). Amino acids were morphed along the non-physical path indicated by horizontal arrows to estimate the corresponding  $\Delta G$  values. The  $\Delta\Delta G$  value for a given mutation can then be obtained by the formula shown under the cycle. Vertical arrows indicate the physical folding or binding pathway. Obtaining the  $\Delta G$  for these paths is considerably more computationally expensive.

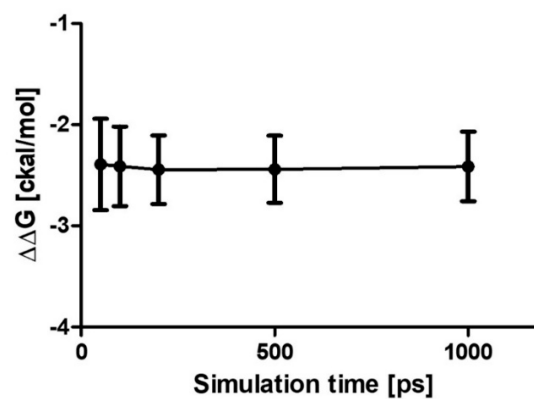

**Figure S5.** Influence of the simulation time of alchemical transformations on the  $\Delta\Delta G_{\text{folding}}$  of PCNA<sub>A148C</sub>.  $\Delta\Delta G_{\text{folding}}$  was calculated from three independent equilibrium trajectories. From these, transition simulations with different length were started. The mean and standard deviation of  $\Delta\Delta G_{\text{folding}}$  are plotted against the simulation time for each transition simulation.
